# Supplementary material
Source: PubMed Central journal article supplement (PMC4769377)

## **APPENDIX**

### **Table of Contents**

**Appendix Table 1.** Event rates and effects of closure versus medical therapy for individual trials (intention-to-treat analyses)

**Appendix Table 2.** Safety Outcomes (intention-to-treat analyses)

**Appendix Table 3.** Stability analyses for recurrent stroke, composite outcome rates and effects of closure (intention-to-treat analyses)

**Appendix Figure 1.** Subgroup analysis for recurrent stroke (intention-to-treat analyses)

**Appendix Figure 2.** Subgroup analysis for composite outcome (Amplatzer device trials)

**Appendix Figure 3.** Subgroup analysis for recurrent stroke (Amplatzer device trials)

**Appendix Table 1.** Event rates and effects of closure versus medical therapy for individual trials (intention-to-treat analyses)

| Analysis                                                        | Outcome rate                                                          |                                                                        | Log-rank Test | Cox PH model                          | Covariate-adjusted Cox PH model                   |
|-----------------------------------------------------------------|-----------------------------------------------------------------------|------------------------------------------------------------------------|---------------|---------------------------------------|---------------------------------------------------|
|                                                                 | Device closure<br>Rate per person-year<br>(events/total person-years) | Medical therapy<br>Rate per person-year<br>(events/total person-years) | p-value       | Hazard ratio*<br>(95% CI);<br>p-value | Hazard ratio <sup>†</sup><br>(95% CI);<br>p-value |
| <b>Analyses of data from individual trials</b>                  |                                                                       |                                                                        |               |                                       |                                                   |
| <b>CLOSURE (N = 909)</b>                                        |                                                                       |                                                                        |               |                                       |                                                   |
| Primary composite outcome                                       | 2.9% (23/783)                                                         | 4.0%(31/771)                                                           | p= 0.294      | 0.75 (0.44 to 1.29);<br>p = 0.296     | 0.72 (0.42 to 1.24);<br>p = 0.238                 |
| Recurrent ischemic stroke                                       | 1.5% (12/798)                                                         | 1.6% (13/795)                                                          | p= 0.865      | 0.93 (0.43 to 2.05);<br>p = 0.865     | 0.84 (0.37 to 1.89);<br>p =0.673                  |
| Secondary composite outcome (ischemic stroke, TIA, early death) | 2.9% (23/783)                                                         | 3.8% (29/771)                                                          | p= 0.433      | 0.80 (0.46 to 1.39);<br>p= 0.434      | 0.77(0.44 to 1.34);<br>p= 0.350                   |
| <b>PC Trial (N = 414)</b>                                       |                                                                       |                                                                        |               |                                       |                                                   |
| Primary composite outcome                                       | 0.8%(7/827)                                                           | 1.4% (11/804)                                                          | p= 0.328      | 0.63 (0.24 to 1.62);<br>p =0.333      | 0.62 (0.24 to 1.64);<br>p = 0.340                 |
| Recurrent ischemic stroke                                       | 0.1% (1/841)                                                          | 0.9% (7/814)                                                           | p= 0.033      | 0.14 (0.02 to 1.15)<br>p = 0.068      | 0.16 (0.02 to 1.34);<br>p = 0.090                 |
| Secondary composite outcome (ischemic stroke, TIA, early death) | 0.6% (5/827)                                                          | 1.4% (11/804)                                                          | p= 0.129      | 0.45 (0.16 to 1.30);<br>p= 0.139      | 0.47(0.16 to 1.36);<br>p= 0.164                   |
| <b>RESPECT (N = 980)</b>                                        |                                                                       |                                                                        |               |                                       |                                                   |
| Primary composite outcome                                       | 1.0% (15/1447)                                                        | 1.7% (21/1217)                                                         | p= 0.163      | 0.63 (0.32 to 1.22);<br>p =0.167      | 0.63 (0.32 to 1.24);<br>p =0.182                  |
| Recurrent ischemic stroke                                       | 0.6% (9/1460)                                                         | 1.3% (16/1231)                                                         | p= 0.081      | 0.49 (0.22 to 1.11);<br>p = 0.088     | 0.50 (0.22 to 1.14);<br>p = 0.100                 |
| Composite outcome (stroke, TIA, early death)                    | 1.0% (15/1447)                                                        | 1.7% (21/1217)                                                         | p= 0.163      | 0.63 (0.32 to 1.22);<br>p= 0.167      | 0.63(0.32 to 1.24);<br>p= 0.182                   |

\* Unadjusted hazard ratios and p-values from Cox PH models; source study was included in the model as a stratification term.

† Adjusted Hazard ratios estimated using Cox PH models combined from ten multiply imputed datasets. Source study was included in the model as a stratification term. Covariates used for adjustment included age, sex, race, coronary artery disease, diabetes, hypertension, hyperlipidemia, prior stroke, smoking status, index event (stroke versus transient ischemic attack), hypermobile septum, and PFO shunt size (large versus small).

CI = confidence interval; N = number of patients; NA = not applicable; PH = proportional hazards.

**Appendix Table 2. Safety Outcomes (intention-to-treat analyses)**

| Safety Outcomes                                                                             | Device closure<br>Rate per person-year<br>(events/total person-years) | Medical therapy<br>Rate per person-year<br>(events/total person-years) | Hazard ratio*<br>(95% CI) | p-value* |
|---------------------------------------------------------------------------------------------|-----------------------------------------------------------------------|------------------------------------------------------------------------|---------------------------|----------|
| <b><i>Analyses using data from all 3 trials<br/>(N = 2303)</i></b>                          | <b>N = 1150</b>                                                       | <b>N = 1153</b>                                                        |                           |          |
| Procedural complications <sup>†</sup>                                                       | 3.3% (37/1105)                                                        | NA                                                                     | NA                        | NA       |
| Bleeding                                                                                    | 0.45% (14/3097)                                                       | 0.31% (9/2860)                                                         | 1.56 (0.68 to 3.61)       | 0.296    |
| Atrial fibrillation                                                                         | 1.49% (45/3024)                                                       | 0.46% (13/3853)                                                        | 3.41 (1.84 to 6.33)       | <0.0001  |
| <b><i>Analyses limited to trials of the<br/>Amplatzer device (N = 1394)<sup>‡</sup></i></b> | <b>N = 703</b>                                                        | <b>N = 691</b>                                                         |                           |          |
| Procedural complications <sup>†</sup>                                                       | 3.4% (24/703)                                                         | NA                                                                     | NA                        | NA       |
| Bleeding                                                                                    | 0.13% (3/2315)                                                        | 0.14% (3/2082)                                                         | 0.95 (0.19 to 4.72)       | 0.952    |
| Atrial fibrillation                                                                         | 0.93% (21/2265)                                                       | 0.48% (10/2070)                                                        | 1.94 (0.91 to 4.12)       | 0.086    |

\* Unadjusted hazard ratios and p-values from Cox PH models; source study was included in the model as a stratification term.

†Data for procedural complications abstracted from original study publications.

‡ Excludes CLOSURE.

CI = confidence interval; N = number of patients; NA = not applicable; PH = proportional hazards.

**Appendix Table 3. Stability analyses, excluding either of the Amplatzer device trials, for recurrent stroke, composite outcome rates and effects of closure (intention-to-treat analyses)**

| Analysis                                                                   | Event Rate                                                            |                                                                        | Cox PH model                                   | Covariate-adjusted Cox PH model*               |
|----------------------------------------------------------------------------|-----------------------------------------------------------------------|------------------------------------------------------------------------|------------------------------------------------|------------------------------------------------|
|                                                                            | Device closure<br>Rate per person-year<br>(events/total person-years) | Medical therapy<br>Rate per person-year<br>(events/total person-years) | Hazard ratio <sup>†</sup><br>(95% CI); p-value | Hazard ratio <sup>†</sup><br>(95% CI); p-value |
| <b><i>Analyses limited to data from the CLOSURE and RESPECT trials</i></b> |                                                                       |                                                                        |                                                |                                                |
| Primary composite outcome                                                  | 1.70% (38/2230)                                                       | 2.62% (52/1988)                                                        | 0.70 (0.46 to 1.06);<br>p = 0.092              | 0.69 (0.45 to 1.05);<br>p = 0.080              |
| Recurrent ischemic stroke                                                  | 0.93% (21/2258)                                                       | 1.43% (29/2026)                                                        | 0.68 (0.39 to 1.19);<br>p = 0.179              | 0.67 (0.38 to 1.18);<br>p = 0.165              |
| <b><i>Analyses limited to data from the CLOSURE and PC Trials</i></b>      |                                                                       |                                                                        |                                                |                                                |
| Primary composite outcome                                                  | 1.86% (30/1610)                                                       | 2.67% (42/1575)                                                        | 0.72 (0.45 to 1.15);<br>p = 0.164              | 0.70 (0.44 to 1.12);<br>p = 0.134              |
| Recurrent ischemic stroke                                                  | 0.79% (13/1640)                                                       | 1.24% (20/1609)                                                        | 0.65 (0.33 to 1.32);<br>p = 0.235              | 0.61 (0.30 to 1.23);<br>p = 0.168              |

\* Adjusted for age, sex, race, coronary artery disease, diabetes, hypertension, hyperlipidemia, prior stroke, smoking status, index event (stroke versus transient ischemic attack), hypermobile septum, and PFO shunt size (large versus small).

†Hazard ratios estimated using Cox PH models combined from ten multiply imputed datasets. For pooled results, the study was included in the model as a stratification term.

CI = confidence interval; PFO = patent foramen ovale; PH = proportional hazards.

**Appendix Figure 1. Subgroup analysis for recurrent ischemic stroke (intention-to-treat analyses)**

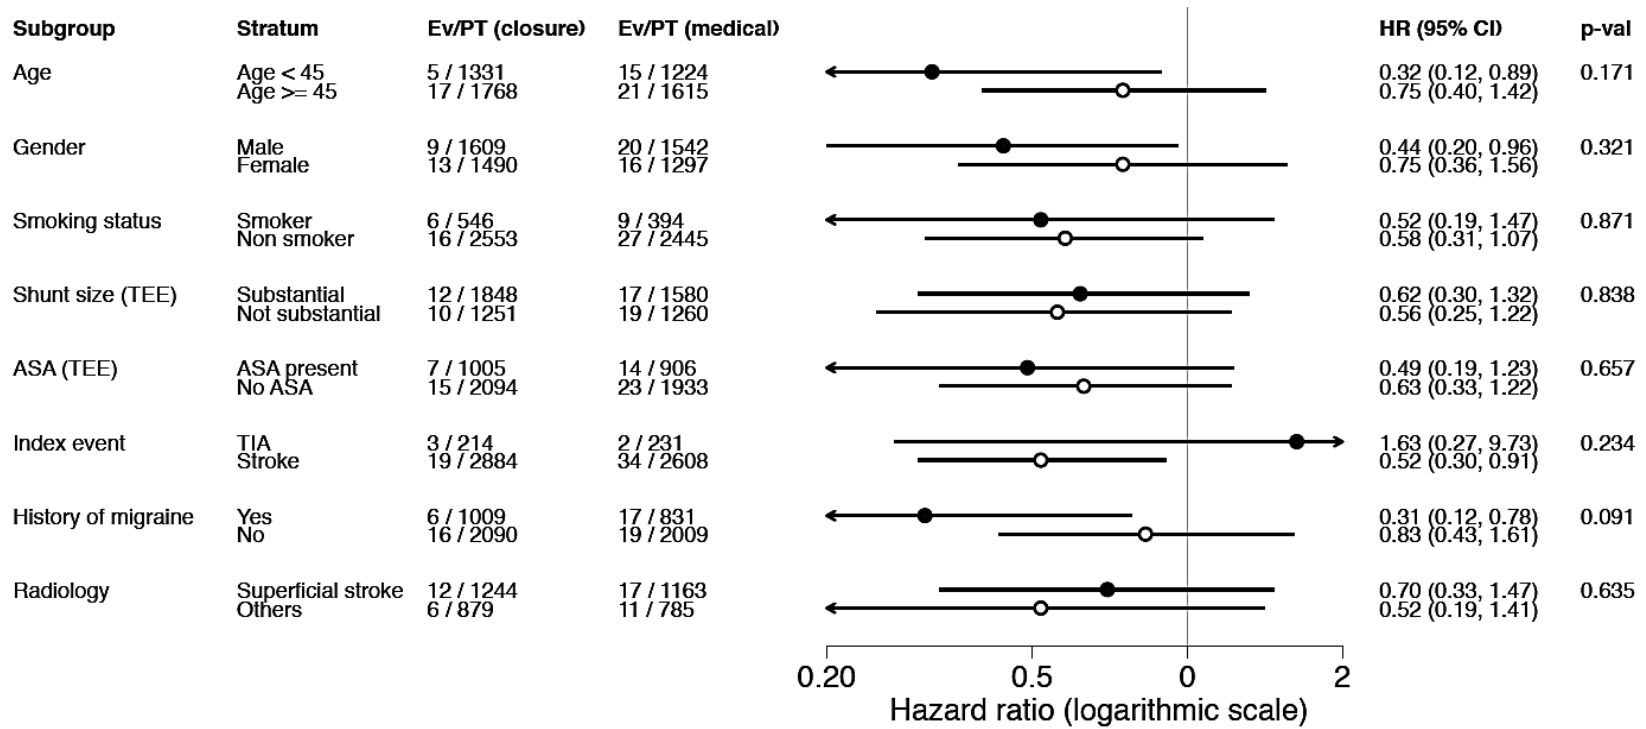

**Appendix Figure 2. Subgroup analysis for composite outcome (Amplatzer device trials)**

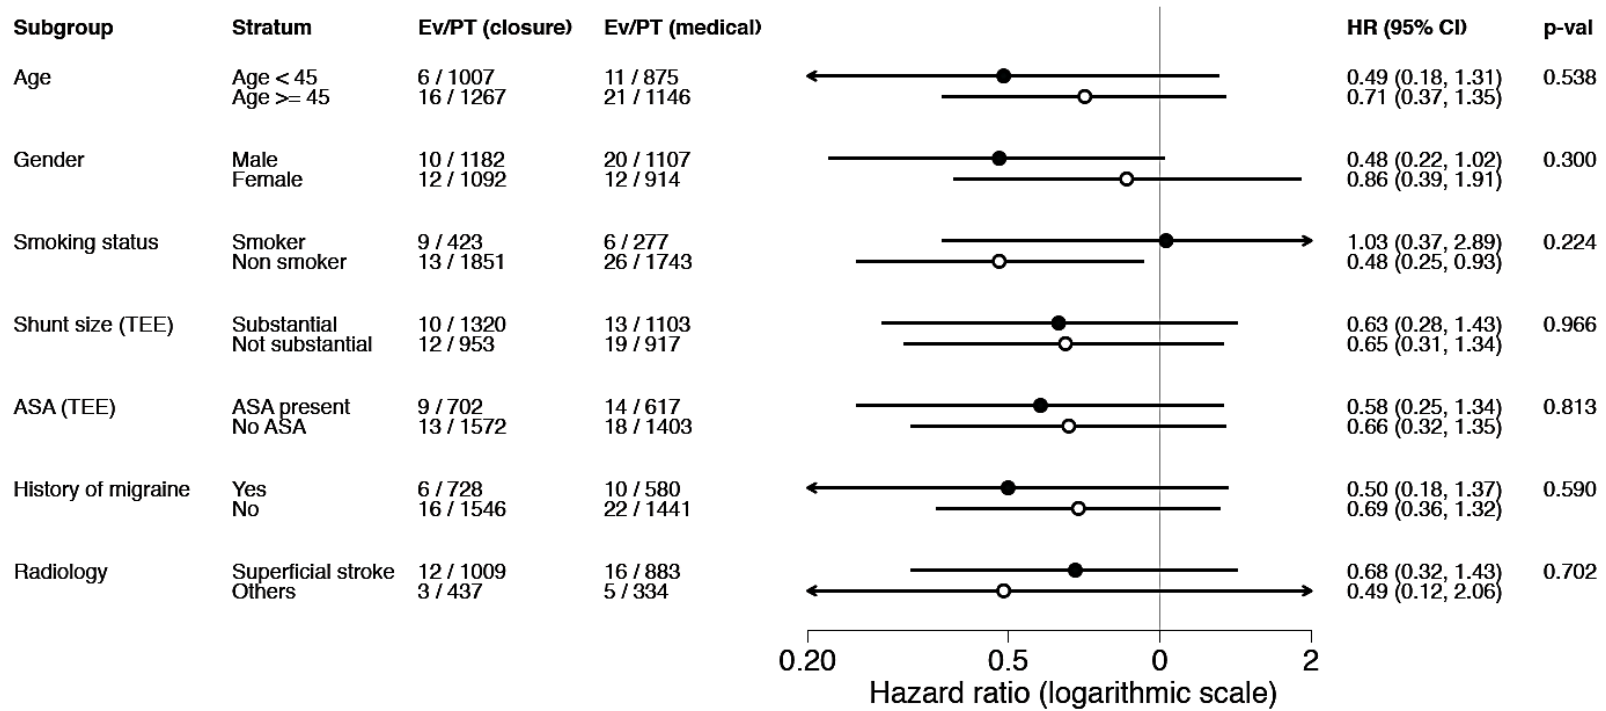

**Appendix Figure 3. Subgroup analysis for recurrent stroke (Amplatzer device trials)**

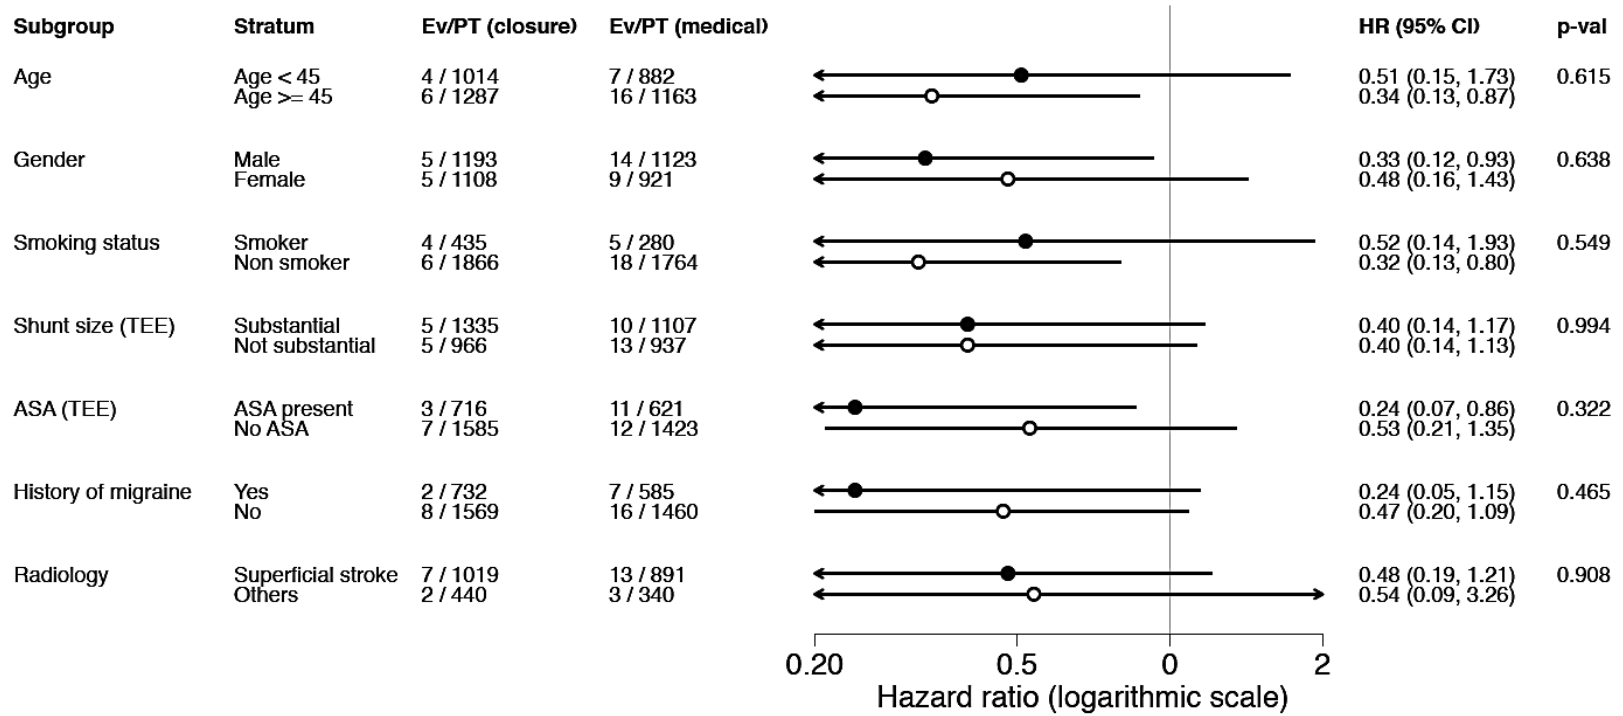

Supplement: NIHMS747782-supplement-supplement_1.pdf [file NIHMS747782-supplement-supplement_1.pdf]
